# Supplementary material for: Social status and ejaculate composition in the house mouse
Source: Philos Trans R Soc Lond B Biol Sci. 2020 Oct 19;375(1813):20200083. doi: 10.1098/rstb.2020.0083 (PMC7661446; doi:10.1098/rstb.2020.0083)
Supplement: Supplementary Figure S1 and Table S1 [file rstb20200083supp3.xlsx]

## Sheet: 140520_HelenSV_CatAnalysis_AllG
Accession		Peptide count	Unique peptides	Confidence score	Anova (p)	q Value	Max fold change	Power	Highest mean condition	Lowest mean condition	Mass	Description		Prot	Accn	Secreted	Chang	Protein	D_1	D_5	D_7	D_11	D_15	D_16	D_19	D_24	S_2	S_4	S_8	S_12	S_14	S_17	S_20	S_23	C_3	C_6	C_9	C_10	C_13	C_18	C_21	C_22		PAIRED TTEST	MeanD	SEMD	MeanS	SEMS	MeanC
P18419	P18419	9	9	1058.08	0.133318	0.161275	1.14608	0.401656	Control	Dom	12507	SVS4_MOUSE Seminal vesicle secretory protein 4 OS=Mus musculus GN=Svs4 PE=1 SV=2	SVS4	SVS4	P18419	Y	17300000	SVS4	1.28701e+07	1.53358e+07	1.23747e+07	1.07034e+07	1.16645e+07	1.51386e+07	1.29136e+07	1.44567e+07	1.54858e+07	1.19136e+07	1.66195e+07	1.27894e+07	1.35783e+07	1.32973e+07	1.52132e+07	1.26028e+07	1.37027e+07	1.64361e+07	1.29919e+07	1.38137e+07	1.62058e+07	1.82743e+07	1.24719e+07	1.6966e+07	SVS4	0.459417	1.31822e+07	587961	1.39375e+07	581753	1.51078e+07
Q8BS30	Q8BS30	36	36	3283.63	0.0107891	0.139142	1.4118	0.806457	Sub	Control	40846	Q8BS30_MOUSE Semenoclotin OS=Mus musculus GN=Semg1 PE=2 SV=1	SVS1	SVS1	Q8BS30	Y	14000000	SVS1	1.37286e+07	1.10901e+07	1.32315e+07	1.37026e+07	1.11158e+07	7.67764e+06	1.31291e+07	1.14735e+07	1.40494e+07	1.0692e+07	1.40017e+07	1.29687e+07	1.75333e+07	1.52731e+07	1.56876e+07	1.68988e+07	1.20543e+07	1.04922e+07	1.54411e+07	1.02712e+07	8.39049e+06	8.75268e+06	1.16583e+07	5.88673e+06	SVS1	0.0506388	1.18936e+07	721576	1.46381e+07	780426	1.03684e+07
Q6WIZ7;Q8JZQ5;Q920F6	Q6WIZ7	48	48	3690.97	0.121916	0.161275	1.23982	0.41893	Sub	Control	93812	Q6WIZ7_MOUSE PSv-2 OS=Mus musculus GN=Svs1 PE=2 SV=1	SVS2	SVS2	Q6WIZ7	Y	270000000	SVS2	7.98277e+06	8.80322e+06	5.96335e+06	6.95534e+06	4.90581e+06	8.55774e+06	7.58691e+06	5.79349e+06	6.55519e+06	7.91253e+06	1.10284e+07	8.07552e+06	7.78223e+06	6.99597e+06	7.55227e+06	6.97009e+06	9.33488e+06	7.87411e+06	6.77863e+06	6.3287e+06	4.01026e+06	5.37788e+06	6.27727e+06	4.72902e+06	SVS2	0.362253	7.06858e+06	497651	7.85902e+06	489708	6.33884e+06
P30933	P30933	9	9	1045.61	0.0921226	0.161275	1.19838	0.472533	Sub	Control	13011	SVS5_MOUSE Seminal vesicle secretory protein 5 OS=Mus musculus GN=Svs5 PE=2 SV=1	SVS5	SVS5	P30933	Y	6400000	SVS5	4.20196e+06	3.97747e+06	5.11119e+06	3.17764e+06	3.31593e+06	4.67985e+06	4.8974e+06	3.77903e+06	5.01726e+06	5.05273e+06	5.79479e+06	3.90528e+06	4.02401e+06	4.75019e+06	4.93028e+06	4.07728e+06	5.16386e+06	4.3651e+06	3.87495e+06	3.70666e+06	2.72692e+06	3.83254e+06	3.90357e+06	3.76203e+06	SVS5	0.0042148	4.14256e+06	252631	4.69398e+06	229722	3.91695e+06
Q64356	Q64356	9	9	822.6	0.145872	0.161275	1.16619	0.384227	Sub	Dom	11475	SVS6_MOUSE Seminal vesicle secretory protein 6 OS=Mus musculus GN=Svs6 PE=2 SV=1	SVS6	SVS6	Q64356	Y	1500000	SVS6	1.95498e+06	4.47381e+06	4.33486e+06	5.07134e+06	4.20273e+06	4.02333e+06	4.75052e+06	3.88423e+06	4.92121e+06	3.9578e+06	4.91339e+06	4.95988e+06	5.0208e+06	5.09539e+06	4.6442e+06	4.61675e+06	4.52956e+06	6.18986e+06	3.85807e+06	3.91668e+06	4.46026e+06	4.87662e+06	5.20172e+06	4.87769e+06	SVS6	0.117052	4.08697e+06	333390	4.76618e+06	130050	4.73881e+06
F2Z472	F2Z472	16	16	1814.24	0.0449555	0.161275	1.2619	0.602485	Sub	Control	30061	F2Z472_MOUSE Seminal vesicle secretion III OS Mus musculus GN Svs3a PE 2 SV 1	SVS3	SVS3	F2Z472	Y	44000000	SVS3	2.62965e+06	2.8754e+06	2.2865e+06	3.5107e+06	1.91852e+06	2.34523e+06	2.66313e+06	2.08523e+06	3.0119e+06	2.39804e+06	2.79574e+06	3.42596e+06	3.53567e+06	2.22323e+06	3.33423e+06	3.21761e+06	3.21165e+06	2.50416e+06	2.60735e+06	2.04579e+06	1.95986e+06	1.97399e+06	2.59569e+06	2.07479e+06	SVS3	0.106453	2.53929e+06	177944	2.9928e+06	170850	2.37166e+06
Q8CEK3	Q8CEK3	4	4	428.92	0.1824	0.164116	1.41498	0.340913	Control	Sub	10877	SPIKL_MOUSE Serine protease inhibitor kazal-like protein, minor form OS=Mus musculus PE=1 SV=1	SPIKL	SPIKL	Q8CEK3	Y	880000	SPIKL	351152	626214	1.44137e+06	1.1405e+06	720093	945027	975765	976005	578277	875190	654589	858244	547453	906331	654269	1.0045e+06	608521	885816	860545	1.05416e+06	1.40122e+06	1.76465e+06	892304	1.13423e+06	SPIKL	0.288092	897015	117485	759857	60445.6	1.07518e+06
Q09098	Q09098	6	6	432.87	0.051119	0.161275	1.32884	0.580254	Control	Sub	11678	PATE4_MOUSE Prostate and testis expressed protein 4 OS=Mus musculus GN=Pate4 PE=1 SV=3	PATE4	PATE4	Q09098	Y	6700000	PATE4	334081	462022	348214	333506	501772	311985	530593	510507	387802	569805	557238	409708	271421	351085	363984	273171	651122	445930	417408	485065	587643	661116	377277	605742	PATE4	0.765151	416585	32859.4	398027	40106.4	528913
P09036	P09036	4	4	335.97	0.447252	0.195434	1.17849	0.173911	Control	Sub	8824	ISK3_MOUSE Serine protease inhibitor Kazal-type 3 OS=Mus musculus GN=Spink3 PE=1 SV=1	ISK3	ISK3	P09036	Y	4500000	ISK3	243972	566180	410400	432189	366134	304641	333793	540419	282935	360572	604479	395623	334569	429809	277399	318603	475707	594184	347496	444370	365810	572251	285941	454403	ISK3	0.65099	399716	39516.1	375498	37586.4	442520
Q3SXH3	Q3SXH3	3	3	268.02	0.470995	0.195434	1.2113	0.164975	Control	Sub	18494	Q3SXH3_MOUSE Seminal vesicle antigen OS=Mus musculus GN=Sva PE=2 SV=1	SVA	SVA	Q3SXH3	Y	21000000	SVA	268370	274553	534262	458409	358752	367131	210005	210026	333933	351836	214068	294785	341499	183959	562613	169301	318753	418165	295282	288269	522457	571977	242780	312408	SVA	0.703374	335189	41375.3	306499	44750.8	371261
Q61400	Q61400	4	4	368.4	0.153062	0.161275	1.35895	0.374899	Control	Sub	29455	CEAMA_MOUSE Carcinoembryonic antigen-related cell adhesion molecule 10 OS=Mus musculus GN=Ceacam10 PE=1 SV=1	Caecam10	Caecam10	Q61400	Y	27000000	Caecam10	161110	183920	390769	270126	309524	266396	478685	406195	234735	322780	320177	244607	239757	242230	234106	342110	339876	369614	360959	401246	289676	443855	210668	547288	Caecam10	0.400475	308341	39134.8	272563	16536.4	370398
P01887	P01887	6	6	322.33	0.712067	0.233472	1.14162	0.0979614	Dom	Sub	13928	B2MG_MOUSE Beta-2-microglobulin OS=Mus musculus GN=B2m PE=1 SV=1	B2MG	B2MG	P01887	Y	9000000	B2MG	97885.1	70600.8	121538	187583	134383	147916	174806	153402	83815.3	145408	98357.1	136936	80155.3	171615	121394	115456	110560	76124.2	136873	110996	162125	168142	88503.1	154778	B2MG	0.327897	136014	13727.7	119142	11163.2	126013
Q8BND5	Q8BND5	19	19	1377.02	0.283008	0.171152	1.17298	0.256927	Control	Dom	83531	QSOX1_MOUSE Sulfhydryl oxidase 1 OS=Mus musculus GN=Qsox1 PE=2 SV=1	Qsox	Qsox	Q8BND5	Y	7700000	Qsox	71574	158846	109240	123688	117097	115721	184814	194845	110561	131048	166307	153129	144733	103682	128675	147934	169997	180944	122804	133253	121049	168526	153665	211687	Qsox	0.934529	134478	14721.1	135759	7559.19	157741
P81117	P81117	16	16	1292.66	0.0322298	0.161275	1.43499	0.657421	Sub	Control	50387	NUCB2_MOUSE Nucleobindin-2 OS=Mus musculus GN=Nucb2 PE=1 SV=2	NUCB2	NUCB2	P81117	Y	1400000	NUCB2	102272	97607.4	84630.7	105326	92670.9	159857	131304	96481.9	85936.2	92126.9	148556	118020	179448	171996	166170	131689	119335	80411.1	120520	108845	56804.3	77173.9	104940	94306	NUCB2	0.0564879	108769	8751.74	136743	12691.4	95291.8
Q07235	Q07235	16	16	1192.71	0.909074	0.272227	1.0397	0.0627273	Control	Dom	44236	GDN_MOUSE Glia-derived nexin OS=Mus musculus GN=Serpine2 PE=2 SV=2	GDN	GDN	Q07235	Y	4700000	GDN	70826.2	89472.6	90196.8	91567.9	77759	96429.6	168162	158217	80625.3	127111	146607	87632	100616	115219	83308.3	101818	164383	115785	83785.7	85865.4	101135	122520	78445.8	124162	GDN	0.998258	105329	12986.7	105367	8149.35	109510
Q3UN54	Q3UN54	3	3	316.97	0.80362	0.25074	1.15385	0.0800603	Control	Sub	11718	SSLP1_MOUSE Secreted seminal-vesicle Ly-6 protein 1 OS=Mus musculus GN=Sslp1 PE=1 SV=1	Ly-6	Ly-6	Q3UN54	Y	1300000	Ly-6	71895.1	57336.8	51716.9	63274.7	34524.1	39209.1	45910.8	32336.4	57881.5	57819.1	42935.2	49205.9	55917.2	47235.1	46941.4	32606.6	82492.1	50727.6	32958.9	64010.3	94523.7	51560.4	45164.8	29188.5	Ly-6	0.871139	49525.5	4991.53	48817.7	3038.92	56328.3
P07724	P07724	24	24	1411.16	0.867473	0.26427	1.86262	0.0691994	Dom	Sub	70700	ALBU_MOUSE Serum albumin OS=Mus musculus GN=Alb PE=1 SV=3	ALBU	ALBU	P07724	Y		ALBU	65850.3	112567	6301.27	10771.3	8745.42	30874.7	12515.9	10003.9	15145.7	12038.5	14139.8	8569.05	27703.9	30409.8	15945.8	14362.9	11203	15320	14839.7	10370.4	28538	36653.4	12259.3	47621.6	ALBU	0.32972	32203.7	13464.9	17289.4	2702.87	22100.7
P12032	P12032	7	7	353.27	0.147689	0.161275	2.09955	0.381827	Sub	Control	23298	TIMP1_MOUSE Metalloproteinase inhibitor 1 OS=Mus musculus GN=Timp1 PE=2 SV=2	TIMP1	TIMP1	P12032	Y		TIMP1	12740.1	20209.5	5357.55	4808.24	24963.4	4408.05	25840.4	34729	16828.9	5578.1	36586.2	3767.41	10564.9	24386.5	22885.4	29252.6	7211.7	18122.9	6606.91	4350.91	1503.96	2749.58	21682.2	9144.16	TIMP1	0.723371	16632	4066.4	18731.3	4110.02	8921.54
P21460	P21460	3	3	277.67	0.314486	0.171152	1.24995	0.237262	Control	Sub	15749	CYTC_MOUSE Cystatin-C OS=Mus musculus GN=Cst3 PE=2 SV=2	CYTC	CYTC	P21460	Y		CYTC	6374.33	8325.61	11508.2	8515.74	9190.98	13589.1	11400.2	14396.5	6442.63	9316.99	10075.7	5221.13	8906.56	12300.4	8981.2	10786.1	8466.58	9088.29	11046.5	10827	11922.5	19292.1	7451.57	11940.1	CYTC	0.0446689	10412.6	980.988	9003.85	803.672	11254.3
P20029	P20029	11	9	731.09	0.500372	0.19958	1.44512	0.154663	Dom	Control	72492	GRP78_MOUSE 78 kDa glucose-regulated protein OS=Mus musculus GN=Hspa5 PE=1 SV=3	BIP	BIP	Q9QY48	Y		BIP	4688.63	19956.2	5556.2	6676.65	6511.59	8623.42	4687.85	2342.38	5498.13	4459.75	4885.08	5440.35	4735.48	2472.3	5947.58	8150.83	3822.24	3965.47	5664.36	3265.89	6066.87	4916.66	4447.52	8707.79	BIP	0.362543	7380.36	1909.33	5198.69	562.459	5107.1
P06869	P06869	5	5	257.22	0.542788	0.210421	1.23087	0.141047	Sub	Dom	49662	UROK_MOUSE Urokinase-type plasminogen activator OS=Mus musculus GN=Plau PE=1 SV=1	UROK	UROK	P06869	Y		UROK	7417.66	5004.2	9377.1	6956.8	8188.15	9119.77	4035.2	5580.29	10776.6	6279.74	7953.25	5134.67	7420.55	12502.5	6164.94	12301.4	6682.78	10674.6	11042.9	10331.5	4360.12	8022.06	6132.32	3154.06	UROK	0.162518	6959.9	688.009	8566.71	1024.61	7550.04
Q9QY48	Q9QY48	4	4	190.97	0.704318	0.232905	1.19691	0.0996224	Dom	Sub	41281	DNS2B_MOUSE Deoxyribonuclease-2-beta OS=Mus musculus GN=Dnase2b PE=2 SV=1	DNS2B	DNS2B	Q9QY48	Y		DNS2B	5956.25	9700.56	3052.03	5285.3	3507.42	6654.48	9527.69	8994.6	4743.37	3801.07	7479.58	7760.62	3493.26	6299.74	6072.47	4361.89	8807.32	3909.77	3440.19	3358.36	3114.27	7829.34	7794.94	7127.96	DNS2B	0.41139	6584.79	927.892	5501.5	579.063	5672.77
Q06890	Q06890	6	6	300.37	0.00542909	0.105025	1.86149	0.873554	Sub	Control	52250	CLUS_MOUSE Clusterin OS=Mus musculus GN=Clu PE=1 SV=1	CLUS	CLUS	Q06890	Y	27000000	CLUS	4348.55	5530.03	2669.05	4101.76	3353.83	7648.72	4117.97	3594.97	5353.76	4954.31	9006.81	4224.69	5790.58	9508.21	6833.12	10033.6	3960.3	4539.4	6099.26	3533.35	1598.99	2913.94	4898.31	2381.49	CLUS	0.0286972	4420.61	546.705	6963.14	797.298	3740.63
Q8BZH1	Q8BZH1	6	6	375.44	0.547593	0.210421	33.6433	0.13959	Dom	Sub	76056	TGM4_MOUSE Protein-glutamine gamma-glutamyltransferase 4 OS=Mus musculus GN=Tgm4 PE=1 SV=2	TGM4	TGM4	Q8BZH1	Y		TGM4	216.024	71.7594	0	0	0	10698.8	0	0	99.5789	39.9641	53.7466	15.8311	93.7764	23.6652	0	0	50.4896	59.6913	95.3762	51.5018	7.63456	0	25.768	1269.77	TGM4	0.351407	1373.33	1332.49	40.8203	13.8074	195.029
P07759;P29621	P07759	4	4	171.92	0.958427	0.278806	1.76404	0.0555944	Dom	Control	47021	SPA3K_MOUSE Serine protease inhibitor A3K OS=Mus musculus GN=Serpina3k PE=1 SV=2	SPA3K	SPA3K	P07759	Y		SPA3K	3043.4	4349.08	725.692	679.811	306.259	649.795	223.193	130.559	2056.33	1191.17	957.739	404.267	443.548	737.251	331.649	137.175	1166.24	744.708	500.105	393.987	696.277	893.287	281.469	1053.84	SPA3K	0.27548	1263.47	550.608	782.392	219.581	716.239
P14211	P14211	3	3	153.38	0.19826	0.165374	2.56465	0.324799	Dom	Sub	48136	CALR_MOUSE Calreticulin OS=Mus musculus GN=Calr PE=1 SV=1	CALR	CALR	P14211	Y		CALR	436.886	3486.6	1342.94	1106.23	761.812	1299.37	260.894	231.928	218.833	345.871	421.23	635.653	375.961	142.432	378.042	962.628	230.637	120.276	392.907	201.963	1188.46	710.241	351.538	1858.23	CALR	0.138938	1115.83	373.316	435.081	91.2063	631.781
Q9Z0J0	Q9Z0J0	2	2	102.72	0.0160105	0.15486	1.78536	0.758647	Control	Dom	16774	NPC2_MOUSE Epididymal secretory protein E1 OS=Mus musculus GN=Npc2 PE=2 SV=1	NPC2	NPC2	Q9Z0J0	Y		NPC2	518.143	785.026	1141.31	805.018	629.723	793.569	1563.22	839.605	628.947	874.616	1204.41	1362.27	728.961	553.063	1206.27	1218.61	1036.32	1406.58	743.388	1393.99	1670.78	2804.69	1257.84	2318.97	NPC2	0.429287	884.452	115.9	972.144	110.5	1579.07
Q9QZL9	Q9QZL9	2	2	95.56	0.269783	0.171152	1.7069	0.265932	Sub	Control	26680	DKKL1_MOUSE Dickkopf-like protein 1 OS=Mus musculus GN=Dkkl1 PE=2 SV=2	DKKL1	DKKL1	Q9QZL9	Y		DKKL1	376.256	1669.09	227.79	72.0593	239.788	857.532	773.501	513.919	576.563	534.589	779.062	401.69	1298.03	1334.52	817.372	274.835	913.938	676.721	508.854	514.088	22.2542	236.875	195.248	456.938	DKKL1	0.505314	591.242	181.426	752.083	138.289	440.614
Q9D309	Q9D309	2	2	93.05	0.313123	0.171152	2.49427	0.238066	Control	Sub	26421	FAM3B_MOUSE Protein FAM3B OS=Mus musculus GN=Fam3b PE=1 SV=1	FAM3B	FAM3B	Q9D309	Y		FAM3B	87.9578	20.724	386.604	54.6677	457.292	621.72	502.425	90.7907	241.64	266.633	333.083	92.5682	119.017	420.642	47.6204	271.856	212.512	185.927	799.926	352.325	125.405	2329.06	246.083	221.139	FAM3B	0.572512	277.773	84.4818	224.132	45.1963	559.048
[truncated: 34 more columns]
